# Supplementary material for: Identification of Quantitative Trait Locus and Candidate Genes for Drought Tolerance in a Soybean Recombinant Inbred Line Population
Source: MDPI journal article supplement (doi:10.3390/ijms231810828), 2022-09-16
Supplement: s1 [file s1]

## Supporting Information

### Identification of Quantitative Trait Locus and candidate genes for drought tolerance in a soybean Recombinant Inbred Line population

Wenqi Ouyang<sup>1#</sup> Limiao Chen<sup>1#</sup> Junkui Ma<sup>2</sup>, Xiaorong Liu<sup>2</sup>, Haifeng Chen<sup>1</sup>, Hongli Yang<sup>1</sup>, Wei Guo<sup>1</sup>, Zhihui Shan<sup>1</sup>, Zhonglu Yang<sup>1</sup>, Shuilian Chen<sup>1</sup>, Yong Zhan<sup>3</sup>, Hengbin Zhang<sup>3</sup>, Dong Cao<sup>1\*</sup>, and Xinan Zhou<sup>1\*</sup>.

<sup>1</sup>Key laboratory of Biology and Genetic Improvement of Oil Crops, Ministry of Agriculture and Rural Affairs, Oil Crops Research Institute of Chinese Academy of Agricultural Sciences, Wuhan, China 430062

<sup>2</sup>The Industrial Crop Institute, Shanxi Academy of Agricultural Sciences, Taiyuan, China 030006

<sup>3</sup>Crop Research Institute, Xinjiang Academy of Agricultural and Reclamation Science, Key Lab of Cereal Quality Research and Genetic Improvement, Xinjiang Production and Construction Crops, Shihezi, China 832000

\*Corresponding authors:

Xin-An Zhou,

Chinese Academy of Agriculture Sciences, Oil Crops Research Institute, Xudong 2nd Road, Wuhan, China 430062, Phone: 86-027-86711563, FAX: 86-027-86711563, Email: [zhouocri@sina.com](mailto:zhouocri@sina.com)

Dong Cao,

Chinese Academy of Agriculture Sciences, Oil Crops Research Institute, Xudong 2nd Road, Wuhan, China 430062, Phone: 86-027-86711563, FAX: 86-027-86711563, Email: [caodong@caas.cn](mailto:caodong@caas.cn);

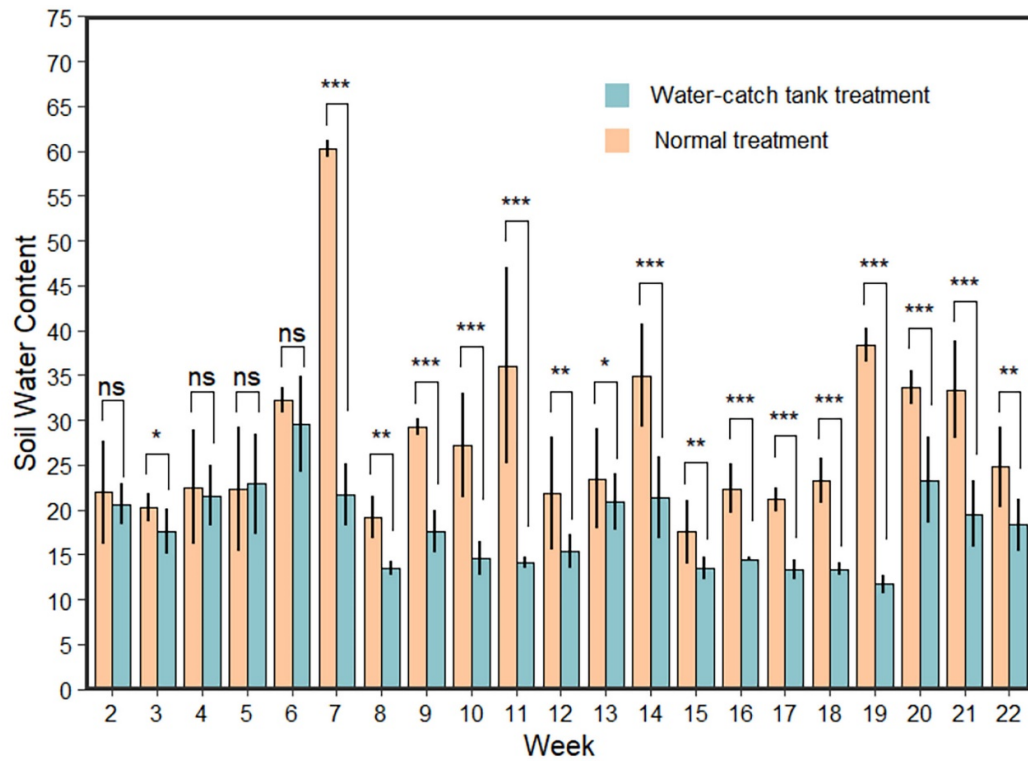

**Supplementary Figure S1.** Comparison of soil water content between normal and catchment tank treatments over 22 weeks. X-axis represents week of drought treatment, and y-axis represents soil water content (%). Statistically significant differences of soil water content between normal treatment and drought treatment (water-catch tank treatment) are marked with asterisks (\* $P < 0.05$ , \*\* $P < 0.01$  and \*\*\*  $P < 0.001$ , Student's t-test. ns, non-significant).

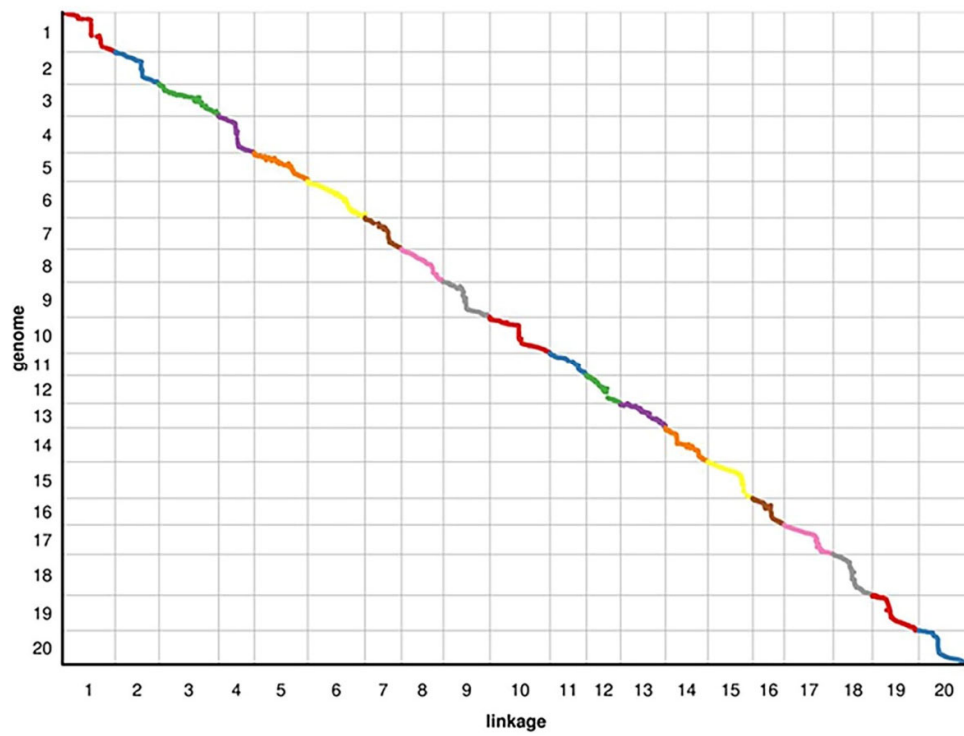

**Supplementary Figure S2.** Relationship between genetic and physical positions with each chromosome. In each plot, genetic distance is on the x-axis, and physical distance is on the y-axis.
